# Supplementary material for: MiR-3150b-3p inhibits the progression of colorectal cancer cells via targeting GOLPH3
Source: PubMed Central journal article supplement (PMC7063393; doi:10.1136/jim-2019-001124), 2019-11-02

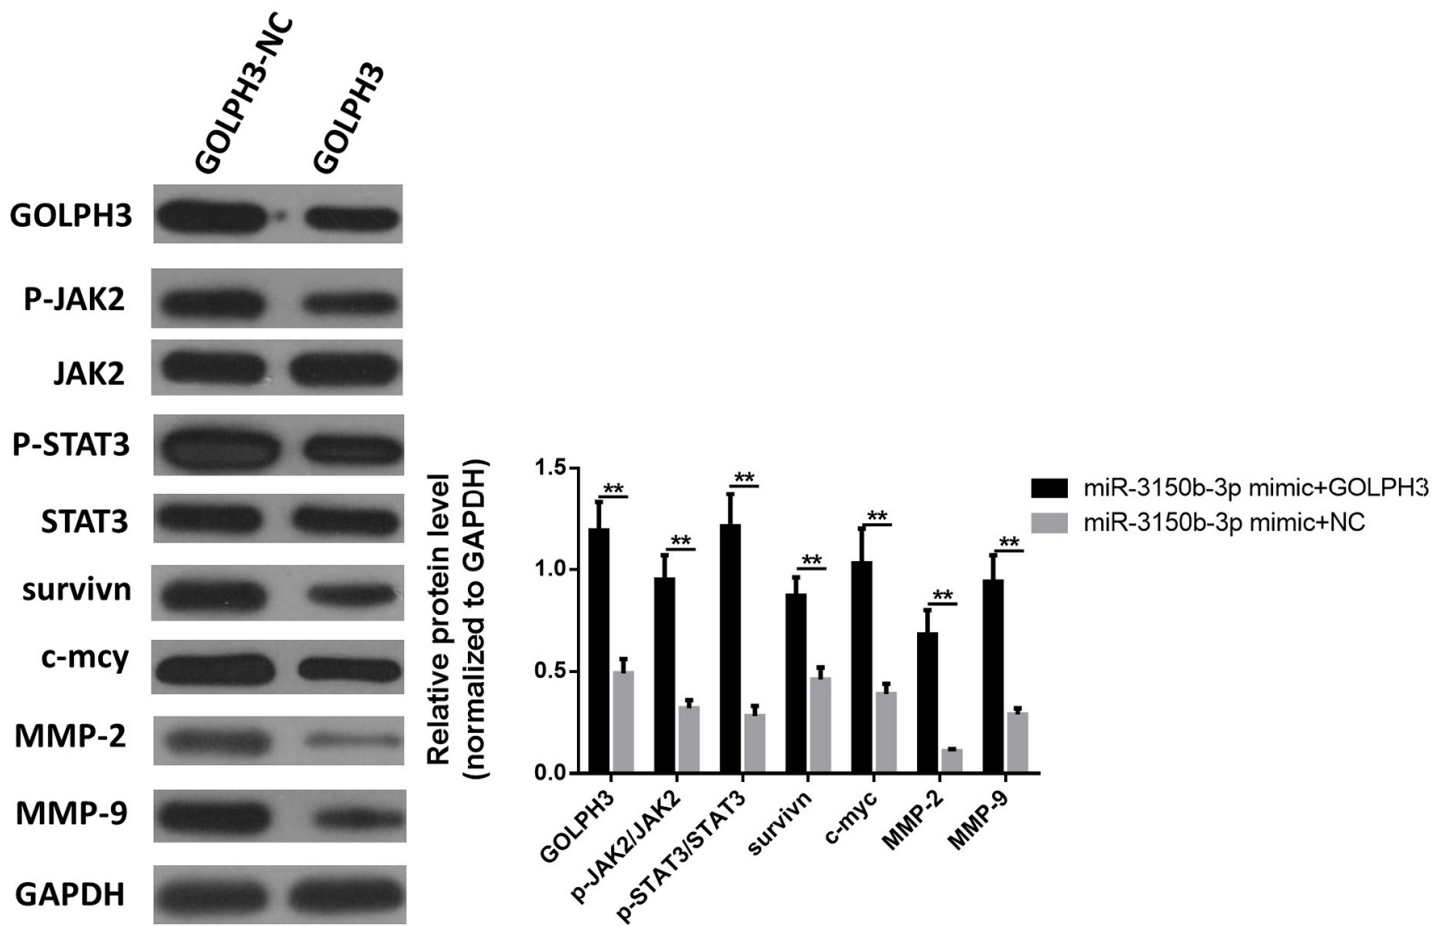

Supplement: jim-2019-001124supp002.pdf [file jim-2019-001124supp002.pdf]
